# Supplementary material for: Effects of wheat intercropping on growth and occurrence of Fusarium wilt in watermelon
Source: PeerJ. 2024 Jun 28;12:e17587. doi: 10.7717/peerj.17587 (PMC11216207; doi:10.7717/peerj.17587)
Supplement: Supplemental Information 1 [file peerj-12-17587-s001.xls]

## Sheet: Sheet1
ChlorophyII content (mg g-1)						Root vigor (µg g-1 h-1)
treatment	Days after transplanting					treatment	Days after transplanting
CK	15	1.558	1.515	1.408		CK	15	19.77	22.333	36.612
NS	15	1.503	1.633	1.662		NS	15	56.087	66.704	45.989
MS	15	1.706	1.745	1.824		MS	15	108.343	84.573	90.092
CK	25	1.806	1.981	1.843		CK	25	246.217	292.853	210.971
NS	25	2.463	2.462	2.197		NS	25	394.125	401.087	492.125
MS	25	2.29	2.328	1.995		MS	25	503.189	472.359	329.151
CK	35	2.108	2.211	2.205		CK	35	303.167	228.507	245.098
NS	35	2.4	2.311	2.523		NS	35	381.976	494.344	430.995
MS	35	2.283	2.369	2.535		MS	35	441.554	562.594	450.226
Photosynthetic rate(μmol m−2s−1)						Intercellular CO2 concentration[μmol (CO2) mol−1]
treatment	Days after transplanting					treatment	Days after transplanting
CK	15	11.975	12.744	12.295		CK	15	132.571	153.762	149.585
NS	15	13.54	15.692	14.801		NS	15	197.596	163.644	170.237
MS	15	13.321	14.765	15.836		MS	15	189.296	162.464	174.416
CK	25	16.81	17.196	18.721		CK	25	141.877	181.459	187.979
NS	25	18.65	19.158	19.226		NS	25	223.817	227.347	217.104
MS	25	19.042	18.956	19.222		MS	25	216.36	214.982	194.478
CK	35	20.647	20.565	19.732		CK	35	215.425	209.254	213.912
NS	35	21.379	21.355	20.637		NS	35	228.228	225.582	237.674
MS	35	21.559	21.957	20.506		MS	35	231.533	222.715	217.778
Stomatal conductance (mol m−2 s−1)						Transpiration rate[mmol (H2O) m−2 s−1]
treatment	Days after transplanting					treatment	Days after transplanting
CK	15	0.08	0.096	0.118		CK	15	2.596	3.031	3.552
NS	15	0.122	0.141	0.121		NS	15	3.566	4.384	3.624
MS	15	0.121	0.144	0.131		MS	15	3.044	3.982	4.926
CK	25	0.123	0.174	0.197		CK	25	4.609	4.541	4.927
NS	25	0.254	0.279	0.22		NS	25	5.145	5.517	5.593
MS	25	0.211	0.249	0.218		MS	25	5.643	4.591	5.5004
CK	35	0.166	0.197	0.174		CK	35	5.53	5.531	6.578
NS	35	0.375	0.327	0.295		NS	35	5.753	6.445	6.022
MS	35	0.286	0.256	0.297		MS	35	6.514	6.262	6.095
CAT activity(μmol mg-1 min-1 protein）						APX activity(μmol mg-1 min-1 protein)
treatment	Days after transplanting					treatment	Days after transplanting
CK	15	5.717	4.627	5.372		CK	15	397.887	354.771	380.795
NS	15	6.686	6.685	7.133		NS	15	421.992	441.495	431.818
MS	15	7.112	7.646	6.679		MS	15	501.517	456.15	430.866
CK	25	5.164	5.129	4.857		CK	25	322.787	271.1	323.718
NS	25	7.156	6.46	6.07		NS	25	425.239	403.552	411.195
MS	25	6.091	6.554	6.79		MS	25	326.181	381.677	388.264
CK	35	4.802	4.383	4.206		CK	35	308.385	295.742	311.253
NS	35	5.772	6.481	6.001		NS	35	388.245	441.257	371.641
MS	35	5.735	5.838	6.343		MS	35	417.286	452.015	404.489
SOD activity（Unit mg-1 protein）						MDA content(nmol mg-1 protein)
treatment	Days after transplanting					treatment	Days after transplanting
CK	15	31.612	25.617	29.289		CK	15	0.709	0.667	0.819
NS	15	35.663	33.96	37		NS	15	0.48	0.639	0.555
MS	15	35.505	38.506	34.552		MS	15	0.515	0.547	0.553
CK	25	28.661	28.954	28.203		CK	25	0.815	0.956	0.873
NS	25	37.886	33.931	30.946		NS	25	0.592	0.558	0.674
MS	25	29.279	33.402	35.192		MS	25	0.585	0.652	0.643
CK	35	24.038	26.429	27.765		CK	35	0.882	1.01	1.067
NS	35	30.966	38.468	30.881		NS	35	0.627	0.672	0.589
MS	35	30.192	33.93	32.13		MS	35	0.788	0.717	0.652
Fresh weight (g plant-1)						Dry weight (g plant-1)
treatment	Days after transplanting					treatment	Days after transplanting
CK	15	110.5	115.2	119.8		CK	15	10.2	10.8	12.3
NS	15	115.5	120.7	122.9		NS	15	10.6	11.5	13.2
MS	15	112.5	125.7	128.8		MS	15	11.3	11.9	13.6
CK	25	238.9	229.5	220.6		CK	25	21.5	23.8	24.3
NS	25	227.7	240.5	238.4		NS	25	22.5	24.7	25.6
MS	25	250.6	237.5	240.2		MS	25	25.3	24.6	23.9
CK	35	280.6	253.8	262.6		CK	35	25.4	27.8	29.7
NS	35	310.4	282.5	309.2		NS	35	30.5	32.4	30.8
MS	35	306.6	310.9	287.5		MS	35	32.6	32.8	30.7
Single fruit weight (g)						Incidence of wilt disease (%)
treatment	Days after transplanting					treatment	Days after transplanting
CK	35	669	650	689.7		CK	15	3.33	6.67	3.33
NS	35	692	726.5	722.5		NS	15	0	0	0
MS	35	719	730	704		MS	15	0	0	0
						CK	25	33.3	39.1	33.3
						NS	25	20	16	16
						MS	25	20	24	20
						CK	35	57.9	72.2	63.2
						NS	35	40	40	50
						MS	35	40	45	50
Number of F.oxysporum (103 CFU g-1)						Number of FON (×108copies g-1 soil)
treatment	Days after transplanting					treatment	Days after transplanting
CK	15	15	16	12		CK	15	13.018	12.513	13.203
NS	15	6	8	6		NS	15	6.085	6.598	4.886
MS	15	10	7	5		MS	15	7.916	9.663	9.534
CK	25	8	9	9		CK	25	10.983	12.067	11.89
NS	25	7	6	4		NS	25	7.58	5.805	5.814
MS	25	3	2	5		MS	25	7.703	9.014	8.638
CK	35	12	14	16		CK	35	13.94	14.405	13.5
NS	35	8	9	7		NS	35	8.37	8.441	7.409
MS	35	11	9	11		MS	35	10.739	11.751	10.819
Number of fungal (103 CFU g-1)						Number of bacterial (106 CFU g-1)
treatment	Days after transplanting					treatment	Days after transplanting
CK	15	27	31	23		CK	15	5	6	4
NS	15	13	12	13		NS	15	8	8	9
MS	15	12	9	15		MS	15	7	8	9
CK	25	14	15	12		CK	25	5	5	6
NS	25	11	10	12		NS	25	10	8	10
MS	25	9	9	11		MS	25	14	12	10
CK	35	14	16	15		CK	35	6	4	6
NS	35	12	8	11		NS	35	7	10	8
MS	35	13	11	9		MS	35	12	14	14
Number of actinomycetes (105 CFU g-1)						Total number (106 CFU g-1)
treatment	Days after transplanting					treatment	Days after transplanting
CK	15	3.4	3	2.6		CK	15	5.367	6.331	4.283
NS	15	1.4	2.2	2.5		NS	15	8.153	8.232	9.263
MS	15	2.3	1.9	1.4		MS	15	7.242	8.199	9.155
CK	25	1.6	1.7	2		CK	25	5.174	5.185	6.212
NS	25	2	1.5	1.9		NS	25	10.211	8.16	10.202
MS	25	2.5	2.6	2.1		MS	25	14.259	12.269	10.221
CK	35	1.8	1.6	1.4		CK	35	6.194	4.176	6.155
NS	35	1.7	2.1	1.8		NS	35	7.182	10.218	8.191
MS	35	1.5	2	1.8		MS	35	12.163	14.211	14.189
Soil sucrase activity(mg g-1 24h-1)						Soil proteinase activity (mg g-1 24h-1)
treatment	Days after transplanting					treatment	Days after transplanting
CK	15	20.044	14.782	19.752		CK	15	0.155	0.216	0.353
NS	15	20.026	27.608	29.746		NS	15	1.167	1.342	1.407
MS	15	26.695	27.48	34.259		MS	15	0.477	0.524	0.359
CK	25	25.799	34.113	29.984		CK	25	0.943	1.155	1.349
NS	25	44.491	45.898	51.252		NS	25	1.034	1.296	1.316
MS	25	44.272	48.346	47.141		MS	25	1.239	1.263	0.966
CK	35	50.923	57.829	63.11		CK	35	1.549	1.142	1.408
NS	35	41.495	46.428	44.674		NS	35	0.948	1.227	0.94
MS	35	34.35	37.457	40.362		MS	35	0.837	0.837	0.976
Soil urease activity (mg g-1 24h-1)						Soil phophatase activity (mg g-1 24 h-1)
treatment	Days after transplanting					treatment	Days after transplanting
CK	15	5.531	5.576	4.94		CK	15	2.716	2.293	2.613
NS	15	10.063	11.246	10.982		NS	15	3.725	3.188	3.555
MS	15	7.7	7.88	6.014		MS	15	3.061	3.578	3.042
CK	25	6.53	6.46	6.124		CK	25	2.463	2.963	2.717
NS	25	6.975	7.472	7.134		NS	25	3.049	3.432	2.848
MS	25	8.739	7.735	8.248		MS	25	3.274	2.882	3.327
CK	35	5.005	5.174	3.694		CK	35	2.673	3.454	2.853
NS	35	6.003	7.622	6.194		NS	35	3.38	2.862	3.123
MS	35	7.308	6.305	6.179		MS	35	3.589	4.577	4.74
Soil peroxidase activity (mg g-1 24h-1)						Soil dehydrogenase activity(μg TPF g-1 6h-1)
treatment	Days after transplanting					treatment	Days after transplanting
CK	15	0.079	0.13	0.108		CK	15	0.406	0.363	0.466
NS	15	0.417	0.54	0.503		NS	15	0.433	0.459	0.476
MS	15	0.307	0.405	0.449		MS	15	0.431	0.371	0.455
CK	25	0.277	0.227	0.2		CK	25	0.295	0.254	0.23
NS	25	0.517	0.653	0.481		NS	25	0.342	0.286	0.336
MS	25	0.708	0.59	0.408		MS	25	0.36	0.392	0.393
CK	35	0.408	0.427	0.621		CK	35	0.446	0.521	0.409
NS	35	1.538	1.534	1.257		NS	35	0.392	0.416	0.396
MS	35	0.935	1.015	0.876		MS	35	0.335	0.281	0.302
