# Supplementary material for: Effects of wheat intercropping on growth and occurrence of Fusarium wilt in watermelon
Source: PeerJ. 2024 Jun 28;12:e17587. doi: 10.7717/peerj.17587 (PMC11216207; doi:10.7717/peerj.17587)
Supplement: Supplemental Information 2 [file peerj-12-17587-s002.xls]

## Sheet: Sheet1
ITEM TO CHECK	IMPORTANCE	CHECKLIST
EXPERIMENTAL DESIGN
Definition of experimental and control groups	E	Line134-141
Number within each group	E	Line151-152
Assay carried out by core lab or investigator's lab?	D
Acknowledgement of authors' contributions	D
SAMPLE
Description	E	Line159-161
Volume/mass of sample processed	D
Microdissection or macrodissection	E	No
Processing procedure	E	Line159-161
If frozen - how and how quickly?	E	Line159-161
If fixed - with what, how quickly?	E	Line159-161
Sample storage conditions and duration (especially for FFPE samples)	E	Line159-161
NUCLEIC ACID EXTRACTION
Procedure and/or instrumentation	E	Line197-199
Name of kit and details of any modifications	E	Line197-199
Source of additional reagents used	D
Details of DNase or RNAse treatment	E	Line199-206
Contamination assessment (DNA or RNA)	E	Line199-206
Nucleic acid quantification	E	Line199-206
Instrument and method	E	Line199-206
Purity (A260/A280)	D
Yield	D
RNA integrity method/instrument	E	Line199-206
RIN/RQI or Cq of 3' and 5' transcripts	E	Line202-205
Electrophoresis traces	D
Inhibition testing (Cq dilutions, spike or other)	E	Line199-206
REVERSE TRANSCRIPTION
Complete reaction conditions	E	Line202-205
Amount of RNA and reaction volume	E	Line202-205
Priming oligonucleotide (if using GSP) and concentration	E	Line202-205
Reverse transcriptase and concentration	E	Line202-205
Temperature and time	E	Line202-205
Manufacturer of reagents and catalogue numbers	D
Cqs with and without RT	D*
Storage conditions of cDNA	D
qPCR TARGET INFORMATION
If multiplex, efficiency and LOD of each assay.	E	No
Sequence accession number	E	Line199-202
Location of amplicon	D
Amplicon length	E	Line202-205
In silico specificity screen (BLAST, etc)	E	No
Pseudogenes, retropseudogenes or other homologs?	D
Sequence alignment	D
Secondary structure analysis of amplicon	D
Location of each primer by exon or intron (if applicable)	E	No
What splice variants are targeted?	E	No
qPCR OLIGONUCLEOTIDES
Primer sequences	E	Line199-202
RTPrimerDB Identification Number	D
Probe sequences	D**
Location and identity of any modifications	E	No
Manufacturer of oligonucleotides	D
Purification method	D
qPCR PROTOCOL
Complete reaction conditions	E	Line202-206
Reaction volume and amount of cDNA/DNA	E	Line202-206
Primer, (probe), Mg++ and dNTP concentrations	E	Line202-206
Polymerase identity and concentration	E	Line202-206
Buffer/kit identity and manufacturer	E	Line202-206
Exact chemical constitution of the buffer	D
Additives (SYBR Green I, DMSO, etc.)	E	Line202-206
Manufacturer of plates/tubes and catalog number	D
Complete thermocycling parameters	E	Line202-206
Reaction setup (manual/robotic)	D
Manufacturer of qPCR instrument	E	Line197-199
qPCR VALIDATION
Evidence of optimisation (from gradients)	D
Specificity (gel, sequence, melt, or digest)	E	Line197-206
For SYBR Green I, Cq of the NTC	E	Line197-206
Standard curves with slope and y-intercept	E	Line197-206
PCR efficiency calculated from slope	E	Line197-206
Confidence interval for PCR efficiency or standard error	D
r2 of standard curve	E	Line207
Linear dynamic range	E	Line197-206
Cq variation at lower limit	E	Line197-206
Confidence intervals throughout range	D
Evidence for limit of detection	E	Line197-206
If multiplex, efficiency and LOD of each assay.	E	No
DATA ANALYSIS
qPCR analysis program (source, version)	E	Line233-235
Cq method determination	E	Line199-206
Outlier identification and disposition	E	No
Results of NTCs	E	No
Justification of number and choice of reference genes	E	Line205
Description of normalisation method	E	Line233-235
Number and concordance of biological replicates	D
Number and stage (RT or qPCR) of technical replicates	E	Line159-161
Repeatability (intra-assay variation)	E	Line159-161
Reproducibility (inter-assay variation, %CV)	D
Power analysis	D
Statistical methods for result significance	E	Line233-235
Software (source, version)	E	Line233-235
Cq or raw data submission using RDML	D
Table 1. MIQE checklist for authors, reviewers and editors. All essential information (E) must be submitted with the manuscript. Desirable
information (D) should be submitted if available. If using primers obtained from RTPrimerDB, information on qPCR target, oligonucleotides,
protocols and validation is available from that source.
*: Assessing the absence of DNA using a no RT assay is essential when first extracting RNA. Once the sample has been validated as
RDNA-free, inclusion of a no-RT control is desirable, but no longer essential.
**: Disclosure of the probe sequence is highly desirable and strongly encouraged. However, since not all commercial pre-designed assay
vendors provide this information, it cannot be an essential requirement. Use of such assays is advised against.
